# Supplementary material for: Human Forebrain Organoid-Derived Extracellular Vesicle Labeling with Iron Oxides for In Vitro Magnetic Resonance Imaging
Source: MDPI journal article supplement (doi:10.3390/biomedicines10123060), 2022-11-28
Supplement: s1 [file s1]

## Supplementary Materials

### **Human Forebrain Organoid-derived Extracellular Vesicle Labelling with Iron Oxides for In Vitro Magnetic Resonance Imaging**

Chang Liu<sup>1, a</sup>, Shannon Helsper<sup>1,2, a</sup>, Mark Marzano<sup>1</sup>, Xingchi Chen<sup>1,3</sup>, Laureana Muok<sup>1</sup>,  
Colin Esmonde<sup>1</sup>, Changchun Zeng<sup>3,4</sup>, Li Sun<sup>1,5</sup>, Samuel C. Grant<sup>1,2,\*</sup>, Yan Li<sup>1,\*</sup>

<sup>1</sup>Department of Chemical and Biomedical Engineering, FAMU-FSU College of Engineering, Florida State University, Tallahassee, Florida, USA

<sup>2</sup>The National High Magnetic Field Laboratory, Florida State University, Tallahassee, Florida.

<sup>3</sup>High Performance Materials Institute, Florida State University, Tallahassee, Florida.

<sup>4</sup>Department of Industrial and Manufacturing Engineering, FAMU-FSU College of Engineering, Florida State University, Tallahassee, Florida, USA

<sup>5</sup>Department of Biomedical Sciences, College of Medicine, Florida State University, Tallahassee, Florida, USA

<sup>a</sup>These two authors contribute equally to this work

**Supplementary Figure S1. *In vitro* MRI for labeled brain organoid-EVs (8-10 nm).** EVs labeled with 8-10 nm USPIO were embedded in 1% agarose gel. (A) Representative  $T_2^*$ -weighted MRI depicting minimal contrast generated from the labeled EVs. The large blooming artifact likely resulting from an aggregation of USPIO was avoided in subsequent image analysis. (B)  $T_2$ ,  $T_2^*$  and  $T_1$  signal intensity profiles were used to extract. (C)  $T_2$ ,  $T_2^*$  and  $T_1$  values.

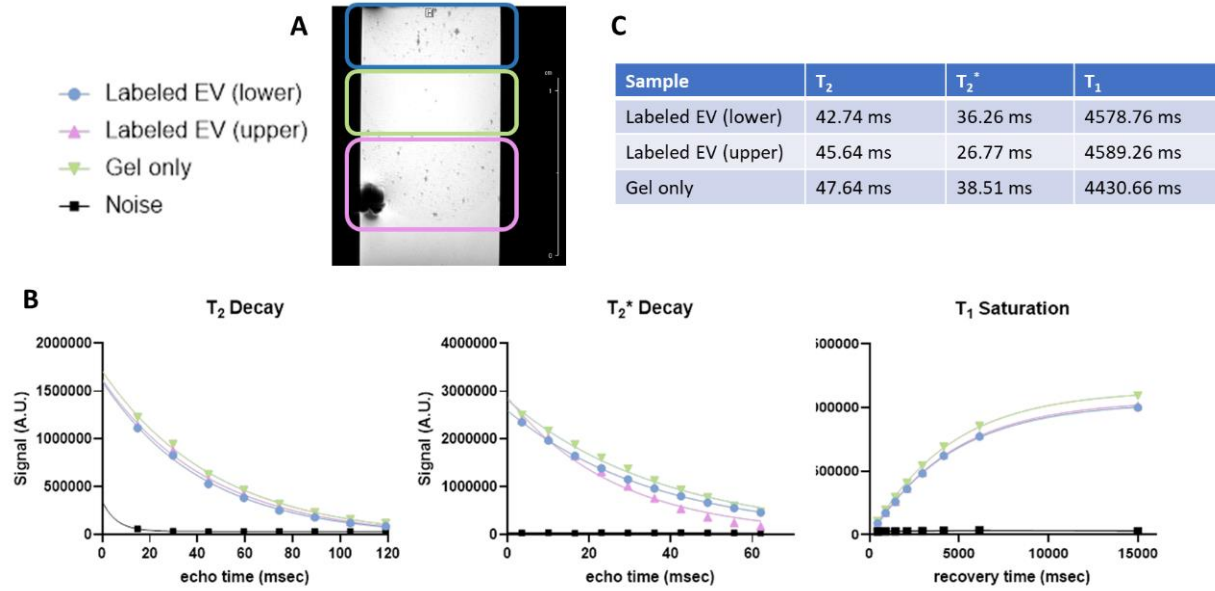

**Supplementary Table S1. A list of antibodies.**

| Cells              | Primary Antibody                            | Origin/ Isotype        | Supplier/ Cat#             | Dilution |
|--------------------|---------------------------------------------|------------------------|----------------------------|----------|
| Neural cells       | FOXG1                                       | Rabbit IgG             | ThermoFisher, PA5-26794    | 1:100    |
|                    | $\beta$ -tubulin III                        | Mouse IgG <sub>1</sub> | Millipore, MAB1637         | 1:200    |
|                    | Nkx2.1                                      | Rabbit IgG             | Thermo Fisher, PA5-25940   | 1:200    |
| Cell-cell adhesion | a-catenin                                   | Mouse-IgG <sub>1</sub> | Sigma, A7811               | 1:100    |
| Secondary          | Alexa 488, goat anti-mouse IgG <sub>1</sub> | -                      | Life Technologies, A-21121 | 1:200    |
|                    | Alexa 488, goat anti-rabbit IgG             | -                      | Life Technologies, A-11034 | 1:200    |

**Supplementary Table S2. Primer sequences for microRNAs by RT-PCR analysis.**

| ID             | Human mirna sequence                                                   | Primer Sequence (5'-3')        |
|----------------|------------------------------------------------------------------------|--------------------------------|
| hsa-miR-21-5p  | UAGCUUAUCAGACUGAUGUUGA                                                 | GCTAGCTTATCAGACTGAT<br>GTTGAAA |
| hsa-miR-22-3p  | AAGCUGCCAGUUGAAGAACUGU                                                 | CGAAGCTGCCAGTTGAAG<br>AAC      |
| hsa-miR-19a-3p | UGUGCAAUAUCUAUGCAAACUGA                                                | TGTGCAAATCTATGCAA<br>ACTGA     |
| hsa-miR-221-3p | AGCUACAUUGUCUGCUGGGUUUC                                                | GCGAGCTACATTGTCTGCT<br>G       |
| hsa-miR-221-5p | ACCUGGCAUACAAUGUAGAUUU                                                 | GCACCTGGCATAACAATGT<br>AGA     |
| hsa-miR-133b   | UUUGGUCCCCUUAACCAGCUA                                                  | GTTTGGTCCCCTTCAACCA            |
| hsa-miR-10a-5p | UACCCUGUAGAUCGAAUUUGUG                                                 | ACCCTGTAGATCCGAATTT<br>GTG     |
| SNORD44        | CCUGGAUGAUGAUAAAGCAAUGC<br>UGACUGAACAUAGAAGGUCUAAU<br>UAGCUCUAAACUGACU | GCAAATGCTGACTGAACA<br>TGAA     |

**Supplementary Table S3. Nanoparticle tracking analysis (NTA) for the EVs used for *in vitro* MRI.** EVs are suspended in 100  $\mu$ L PBS, NTA was conducted by 1:1000 dilution. So the total number of EVs is around  $1.25 \times 10^{11}$  particles in 100  $\mu$ L

| Concentration/mL | Mode (nm) | Mean (nm) | SD (nm) |
|------------------|-----------|-----------|---------|
| 1.34e9           | 125       | 187       | 72      |
| 1.25e9           | 124       | 183       | 63      |
| 1.15e9           | 144       | 198       | 107     |
